# Supplementary material for: Acute Statin Treatment Improves Antibody Accumulation in EGFR- and PSMA-Expressing Tumors
Source: Oxford University Press journal article supplement (doi:10.1158/1078-0432.ccr-20-1960), 2020-09-30
Supplement: 10780432ccr201960-sup-243797_3_supp_6577368_qgq40r.docx [file 10780432ccr201960-sup-243797_3_supp_6577368_qgq40r.docx]

**SUPPLEMENTARY INFORMATION**

**Acute pharmacologic modulation of membrane receptors to improve tumor delivery of antibodies against EGFR and PSMA**

Patrícia M. R. Pereira1, Komal Mandleywala1, Ashwin Ragupathi1, Jason S. Lewis1,2,3,4,5*

**Affiliations:**

1 Department of Radiology, Memorial Sloan Kettering Cancer Center, New York, NY 10065, USA

2 Molecular Pharmacology Program, Memorial Sloan Kettering Cancer Center, New York, NY, USA

3 Department of Pharmacology, Weill Cornell Medical College, New York, NY, USA

4 Department of Radiology, Weill Cornell Medical College, New York, NY, USA

5 Radiochemistry and Molecular Imaging Probes Core, Memorial Sloan Kettering Cancer Center, New York, NY, USA

**Corresponding author:**

J. S. Lewis [lewisj2@mskcc.org](mailto:lewisj2@mskcc.org) P: +1 646-888-3038, Fax: 646-888-3059

P. M. R. Pereira [ribeirop@mskcc.org](mailto:ribeirop@mskcc.org) P: +1 646-888-2763


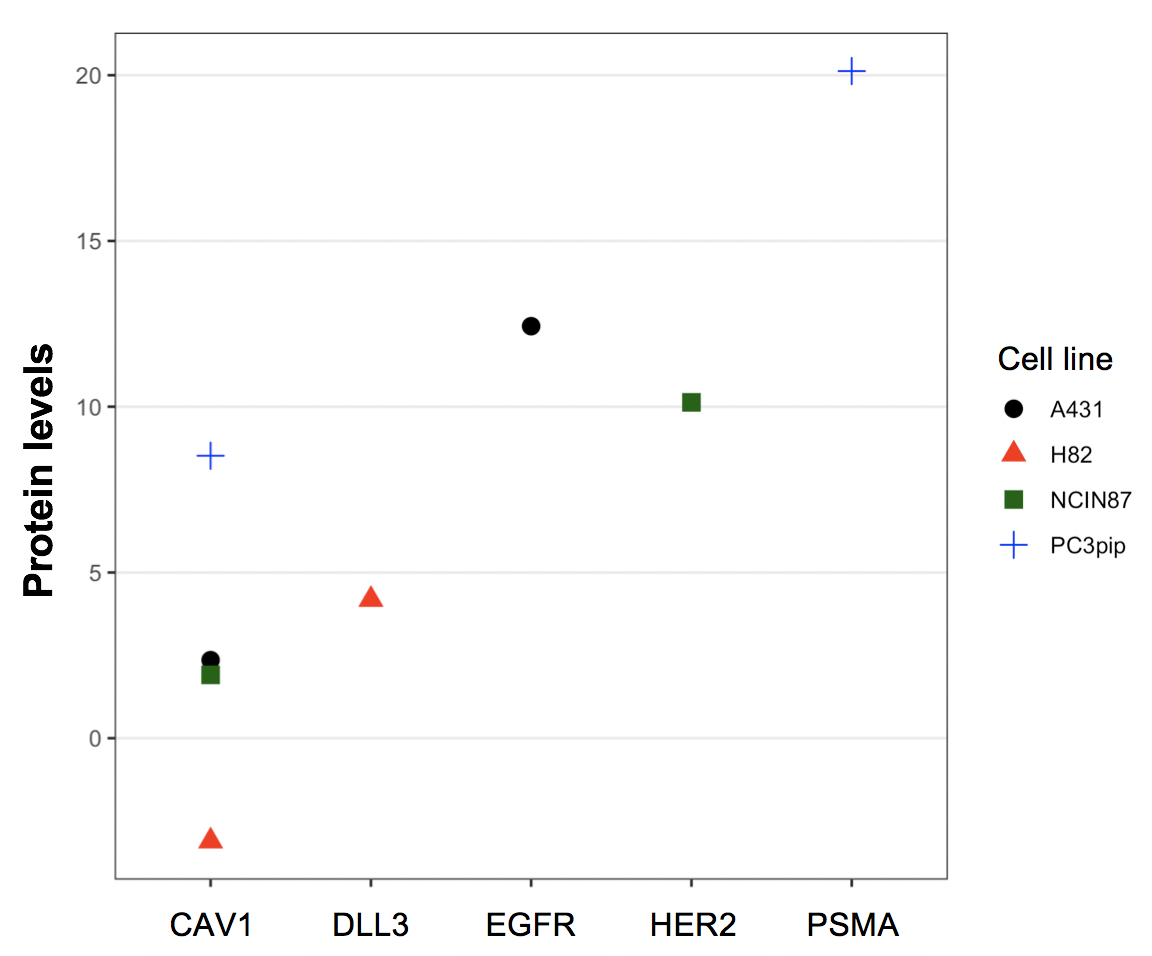


**Supplementary Figure 1.** CAV1, DLL3, EGFR, HER2, and PSMA proteins expression (mRNA, log2ratio) in A431, H82, NCIN87, and PC3pip cancer cell lines. The mRNA data was obtained from the Cancer Cell Line Encyclopedia (CCLE). The mRNA values shown in the graph were collected for microarray at CLLE where RMA normalization is used to normalize the expression and the data is converted to log2. A difference of 1 unit on the y-scale corresponds to a 2-fold expression difference between two cell-types.


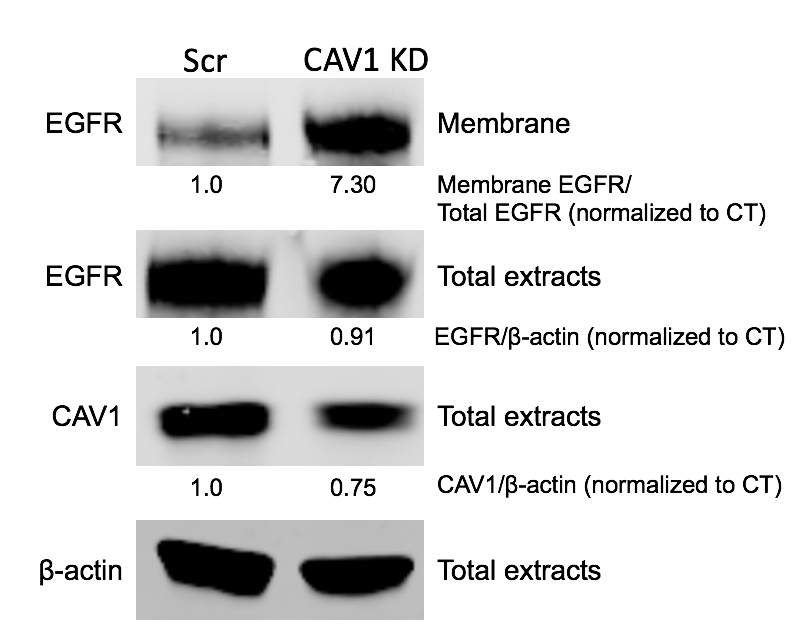


**Supplementary Figure 2.** Western blot of biotinylated cell surface-associated EGFR along with EGFR and CAV1 in total lysates of A431 cells at 48 h after treatment with siGENOME siRNA CAV1 reagent. Knockdown of CAV1 increases EGFR at the cell membrane of A431 cancer cells.

**
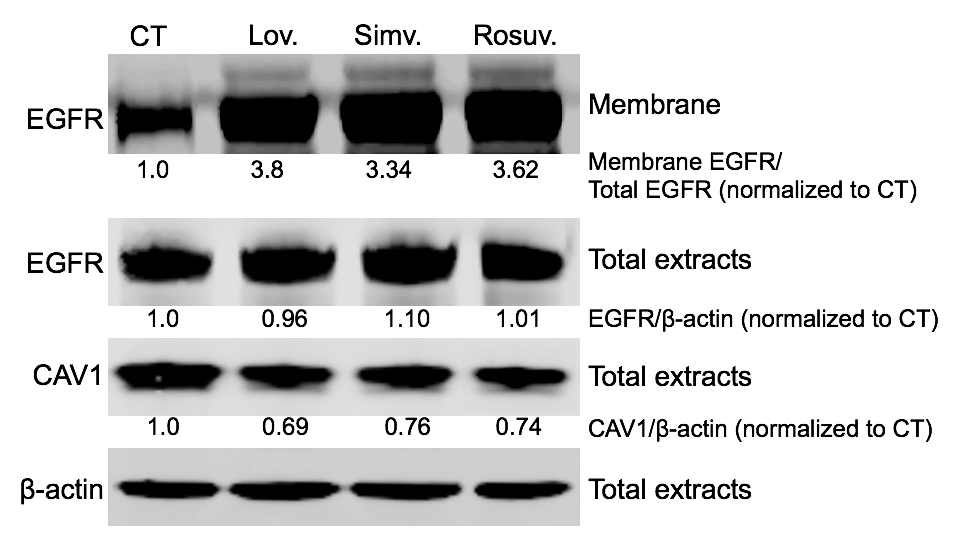
**

**Supplementary Figure 3.** Western blot of biotinylated cell surface-associated EGFR along with EGFR and CAV1 in total lysates of A431 cells treated 25 μM of statins during 4 h. Lovastatin and simvastatin were converted into their active β-hydroxy acid forms before cells’ treatment. Quantification of the western blot membrane shows that statins increase EGFR at the cell membrane of A431 cancer cells. Lov, lovastatin; sim, simvastatin; rosuv, rosuvastatin.

**
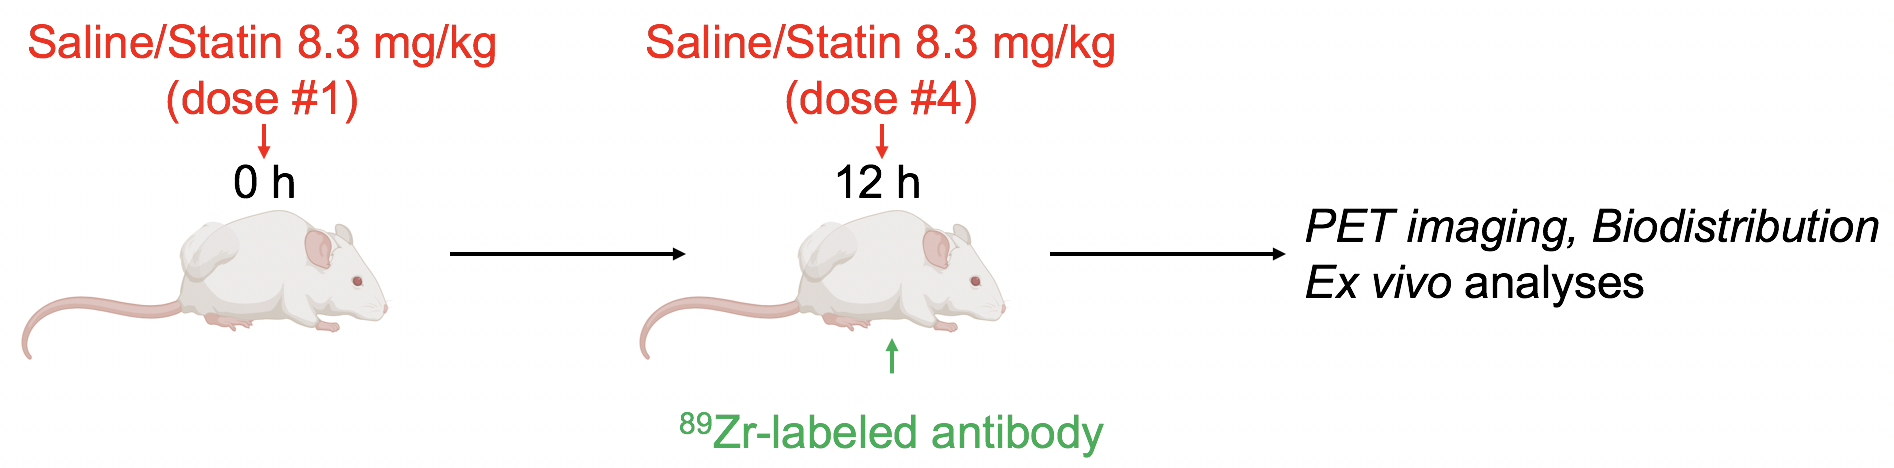
**

**Supplementary Figure 4.** Schematic diagram of nude mice bearing EGFR+ A431, PSMA-overexpressing PC3pip, or DLL3+ H82 tumors treated with statin and used in PET imaging and biodistribution studies with [89Zr]Zr-DFO-panitumumab, [89Zr]Zr-DFO-cetuximab, [89Zr]Zr-DFO-huJ591, or [89Zr]Zr-DFO-SC16. Lovastatin, simvastatin, or rosuvastatin were orally administered twice with an interval of 12 h (8.3 mg/kg of mice). The 89Zr-labeled antibody was then administered by tail vein injection at 12 h after the first dose of statin.

**
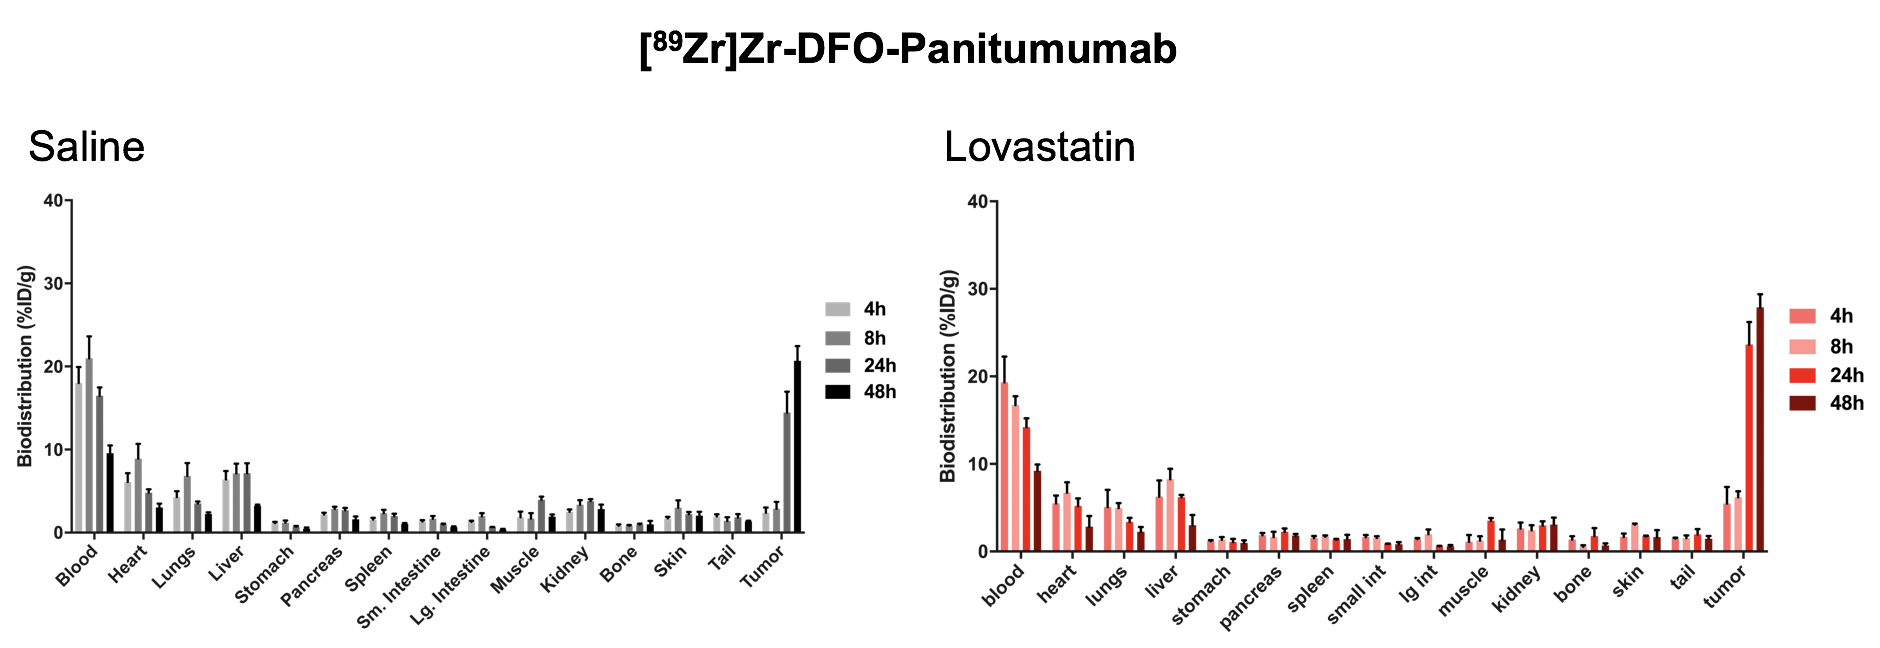
**

**Supplementary Figure 5.** Biodistribution data in saline- and lovastatin-treated mice bearing s.c. A431 (EGFR+) tumors at 4, 8, 24, and 48 h p.i. of [89Zr]Zr-DFO-Panitumumab. Lovastatin (8.3 mg kg−1 of mice) was orally administrated 12 h prior and at the same time as the tail vein injection of [89Zr]Zr-DFO-Panitumumab (3.70–5.55 Mbq, 22.2–33.3 μg protein). Bars, *n* = 5 mice per group, mean ± S.E.M. %ID g−1, percentage of injected dose per gram.

**
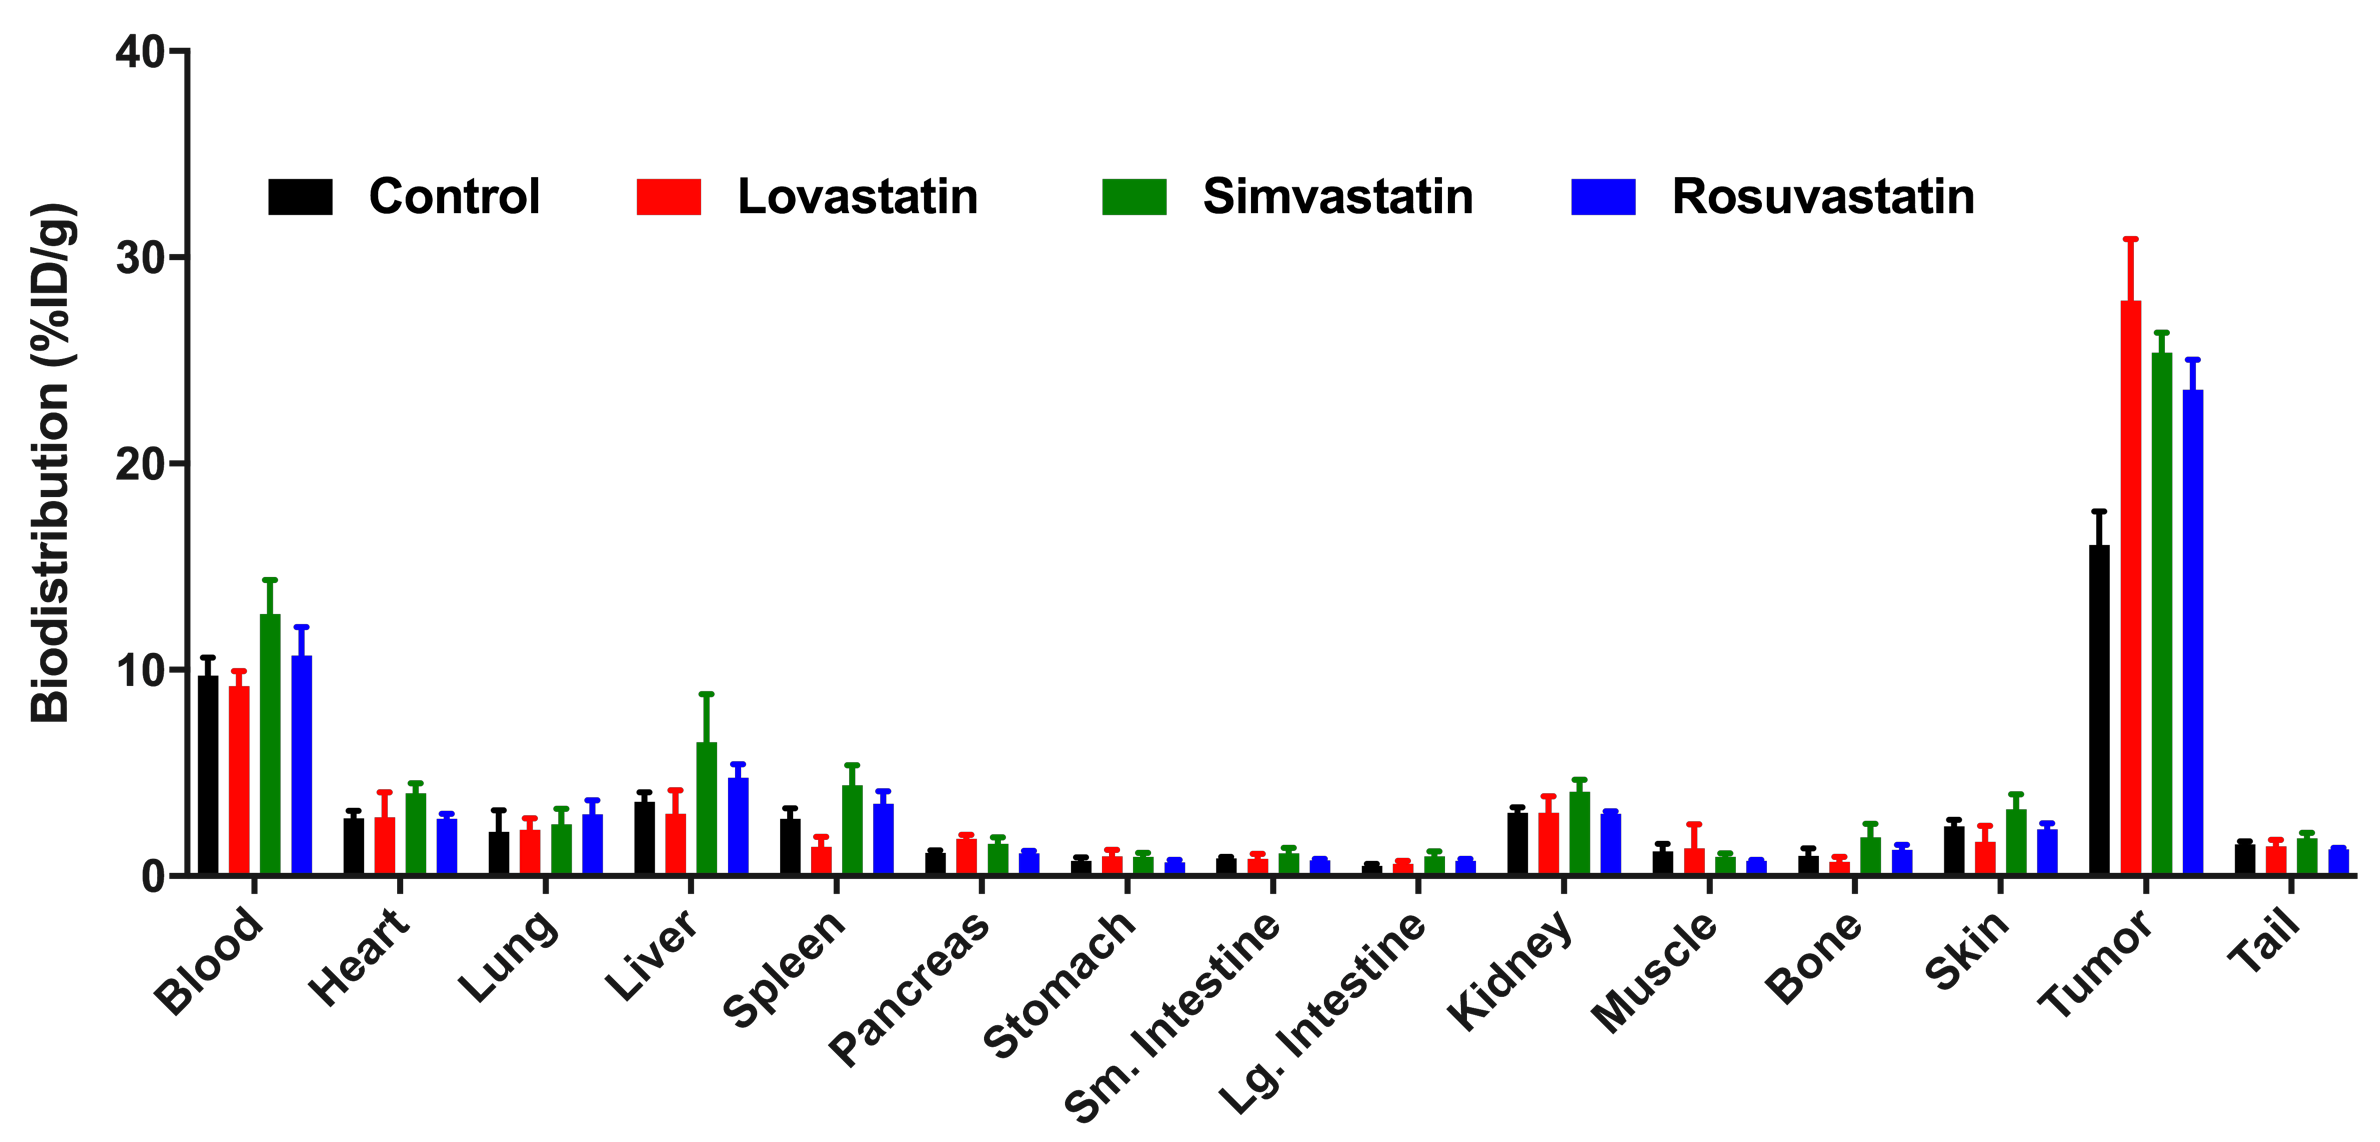
**

**Supplementary Figure 6.** Biodistribution data at 48 h p.i. of [89Zr]Zr-DFO-Panitumumab in athymic nude mice bearing s.c. EGFR+ A431 tumors. Statins (8.3 mg kg−1 of mice) were orally administrated 12 h prior and at the same time as the tail vein injection of [89Zr]Zr-DFO-Panitumumab (3.70–5.55 Mbq, 22.2–33.3 μg protein). Bars, *n* = 5 mice per group, mean ± S.E.M. %ID g−1, percentage of injected dose per gram.

**
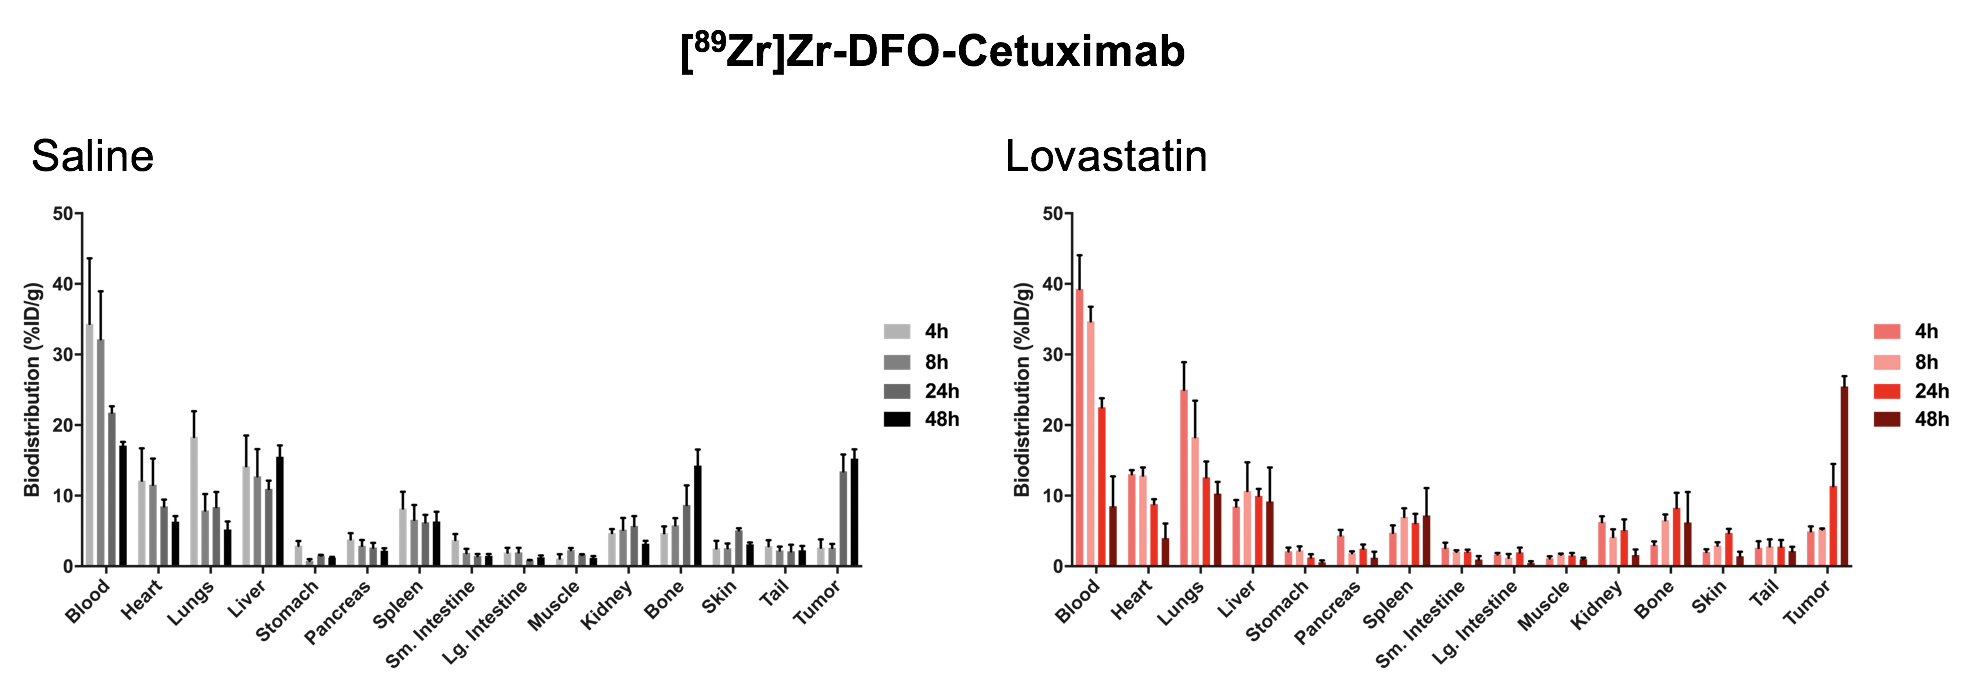
**

**Supplementary Figure 7.** Biodistribution data in saline- and lovastatin-treated mice bearing s.c. A431 (EGFR+) tumors at 4, 8, 24, and 48 h p.i. of [89Zr]Zr-DFO-Cetuximab. Lovastatin (8.3 mg kg−1 of mice) was orally administrated 12 h prior and at the same time as the tail vein injection of [89Zr]Zr-DFO-Cetuximab (3.70–5.55 Mbq, 23.8–35.7 μg protein). Bars, *n* = 5 mice per group, mean ± S.E.M. %ID g−1, percentage of injected dose per gram.

**
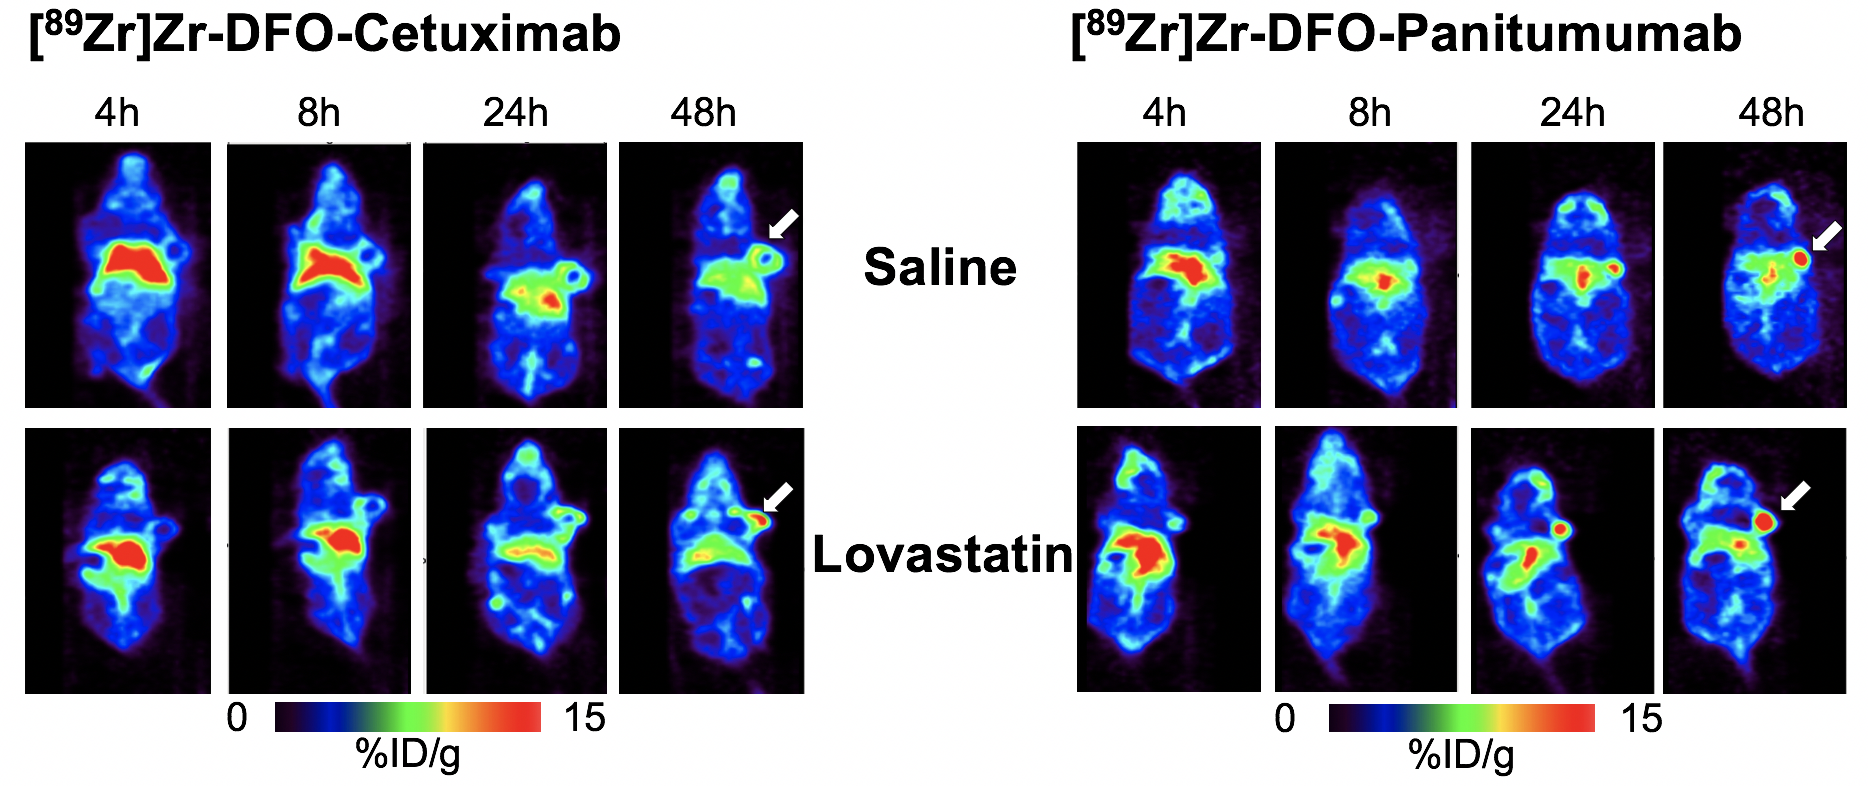
**

**Supplementary Figure 8.** Representative coronal PET images in saline- and lovastatin-treated mice bearing s.c. A431 tumors at 4, 8, 24, and 48 h p.i. of [89Zr]Zr-DFO-Cetuximab or [89Zr]Zr-DFO-Panitumumab. Lovastatin (8.3 mg kg−1 of mice) was orally administered 12 h prior and at the same time as the tail vein injection of [89Zr]Zr-DFO-Cetuximab (3.70–5.55 Mbq, 23.8–35.7 μg protein) or [89Zr]Zr-DFO-Panitumumab (3.70–5.55 Mbq, 22.2–33.3 μg protein).


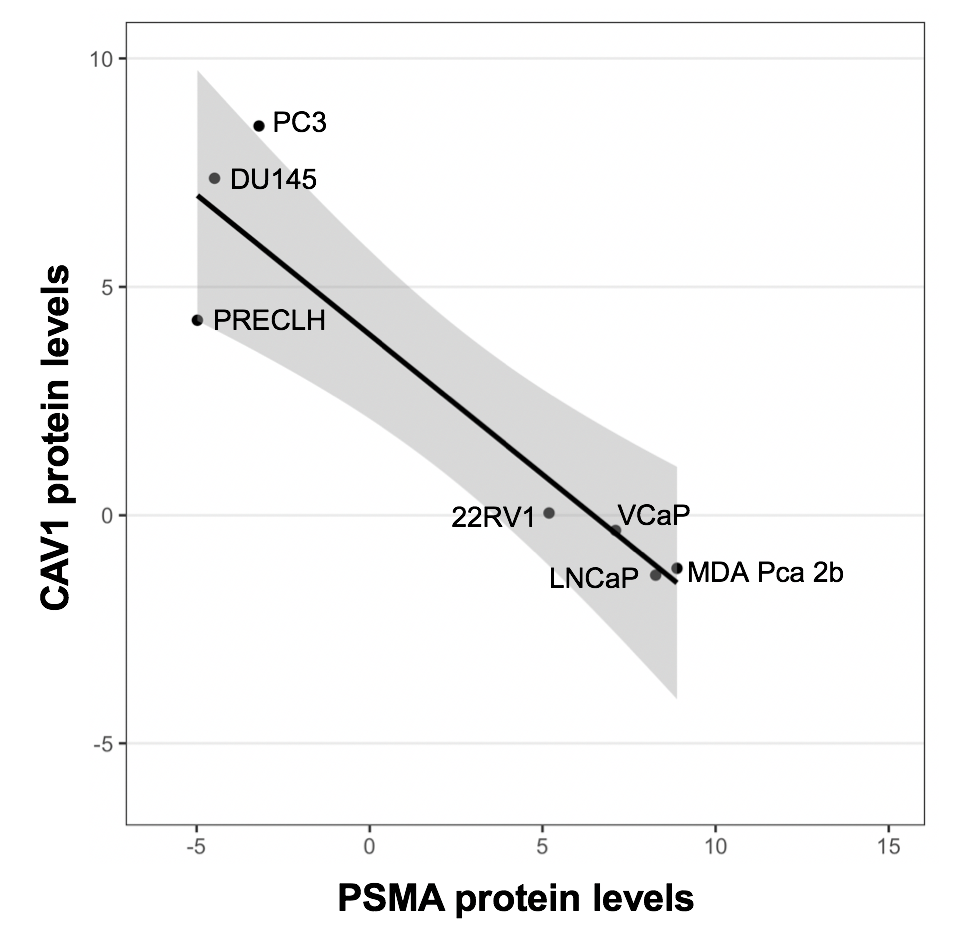


**Supplementary Figure 9.** Correlation between CAV1 and PSMA proteins in prostate cancer cell lines (*n* = 7) from data of the Cancer Cell Line Encyclopedia (CCLE).


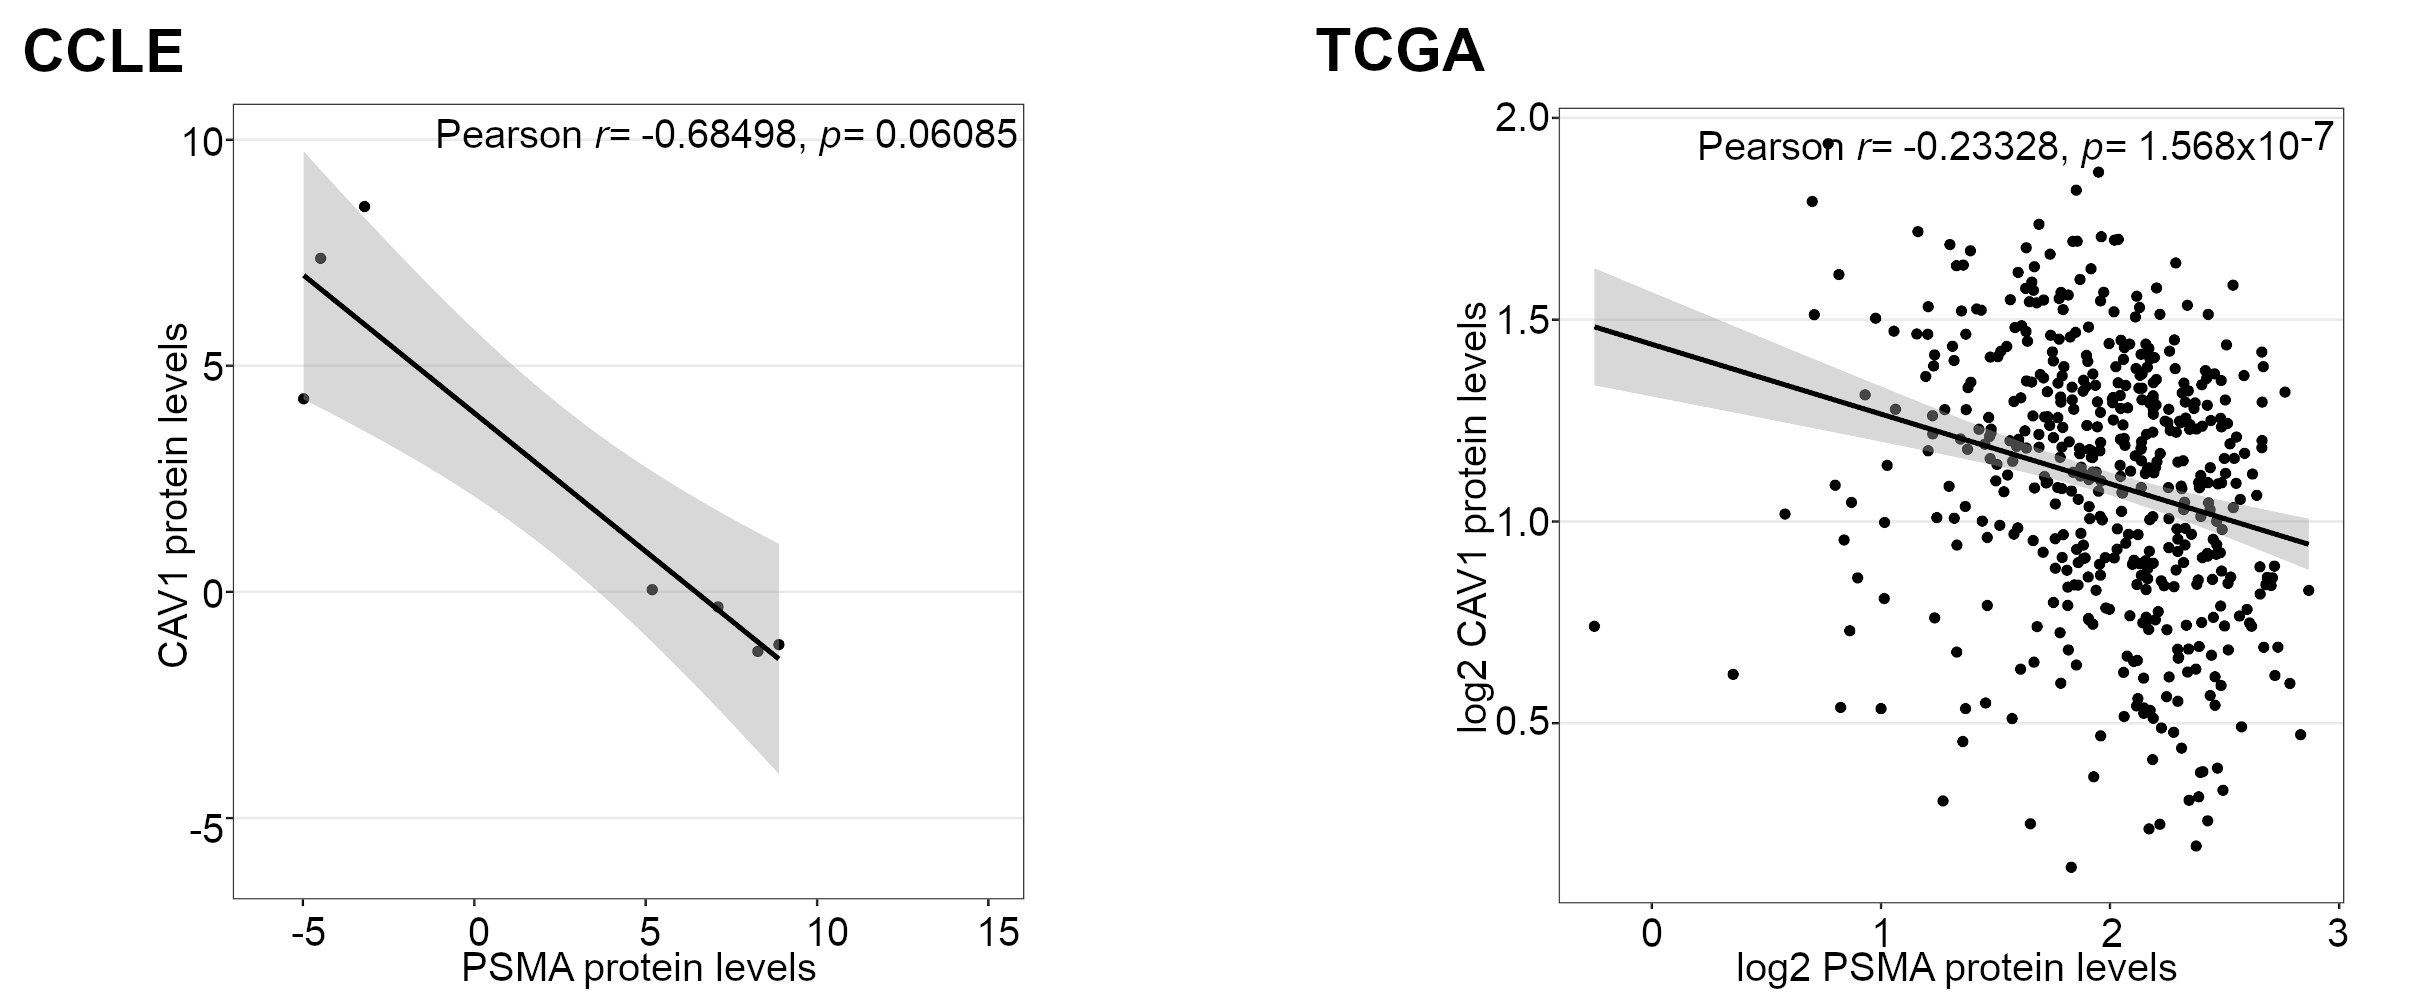


**Supplementary Figure 10.** Correlation between CAV1 and PSMA proteins in prostate cancer cell lines and prostate tumors obtained from data of Cancer Cell Line Encyclopedia (CCLE) and The Cancer Genome Atlas (TCGA <https://www.cancer.gov/tcga>). PSMA expression negatively correlates with CAV1 protein levels.


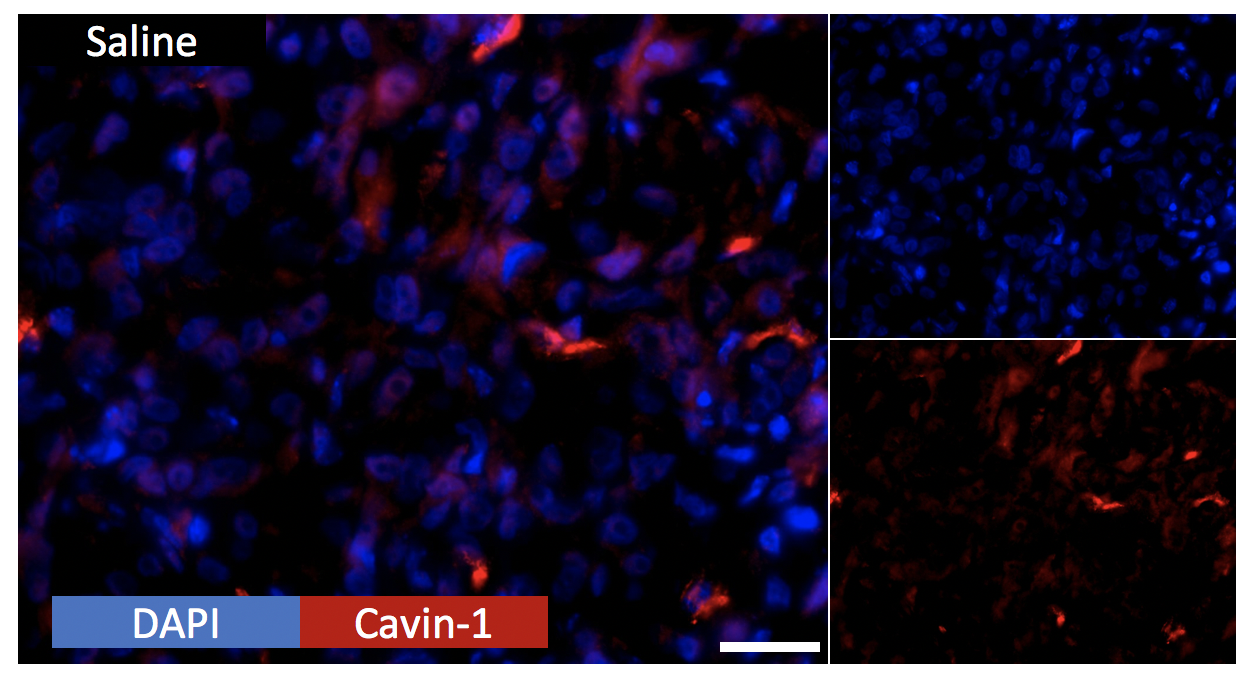


**Supplementary Figure 11.** Confocal images of immunofluorescence staining of cavin-1 in s.c. PC3pip tumors from athymic nude mice.

**
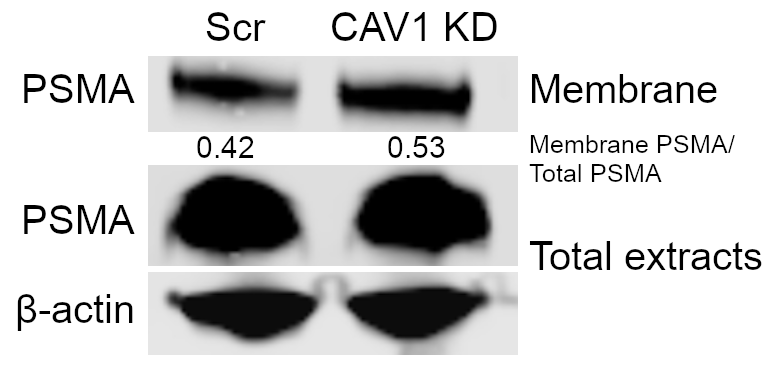
**

**Supplementary Figure 12.** Western blot of biotinylated cell surface-associated PSMA along with PSMA in total lysates of PC3pip cells transfected for 48 h with CAV1 siRNA or scrambled control siRNA constructs from Santa Cruz Biotechnology.


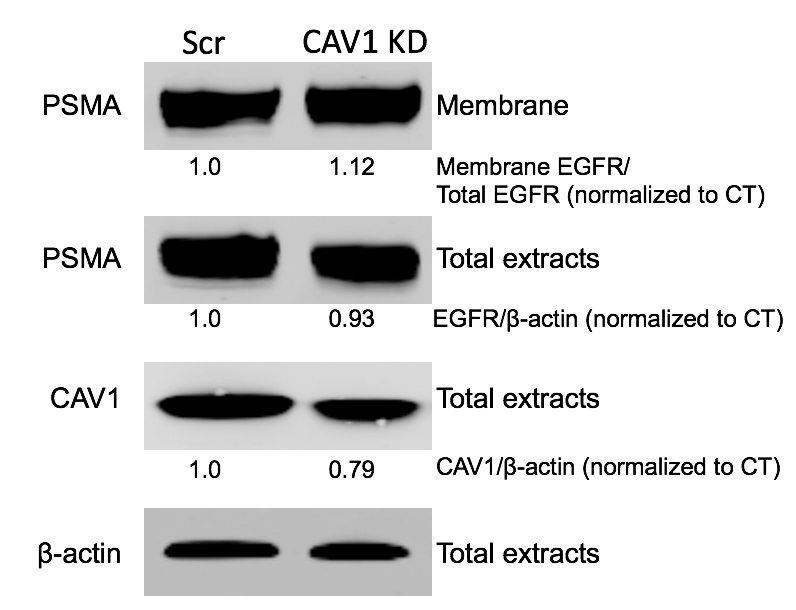
.

**Supplementary Figure 13.** Western blot of biotinylated cell surface-associated PSMA along with PSMA in total lysates of PC3pip cells transfected for 48 h with siGENOME CAV1 siRNA or scrambled control siRNA constructs.


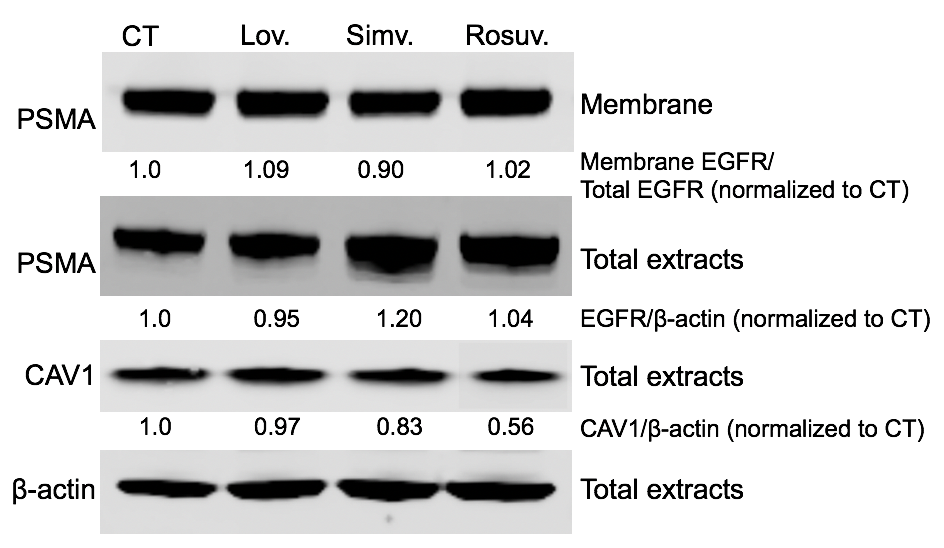


**Supplementary Figure 14.** Western blot of biotinylated cell surface-associated PSMA along with PSMA and CAV1 in total lysates of PC3pip cells treated 25 μM of statins during 4 h. Lovastatin and simvastatin were converted into their active β-hydroxy acid forms before cells’ treatment.

**
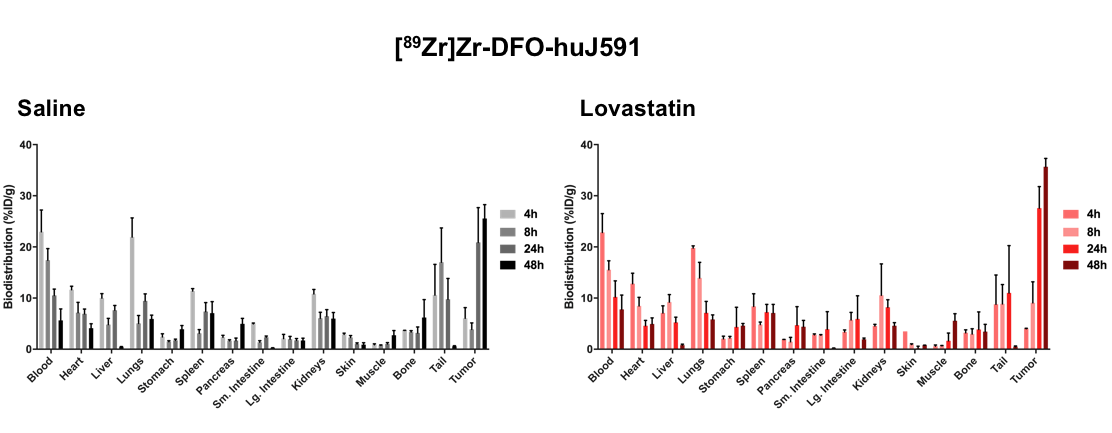
**

**Supplementary Figure 15.** Biodistribution data in saline- and lovastatin-treated mice bearing s.c. PSMA-overexpressing PC3pip tumors at 4, 8, 24, and 48 h p.i. of [89Zr]Zr-DFO-huJ591. Lovastatin (8.3 mg kg−1 of mice) was orally administrated 12 h prior and at the same time as the tail vein injection of [89Zr]Zr-DFO-huJ591 (3.70–5.55 Mbq, 18.2–27.3 μg protein). Bars, *n*= 5 mice per group, mean ± S.E.M. %ID g−1, percentage of injected dose per gram.

**
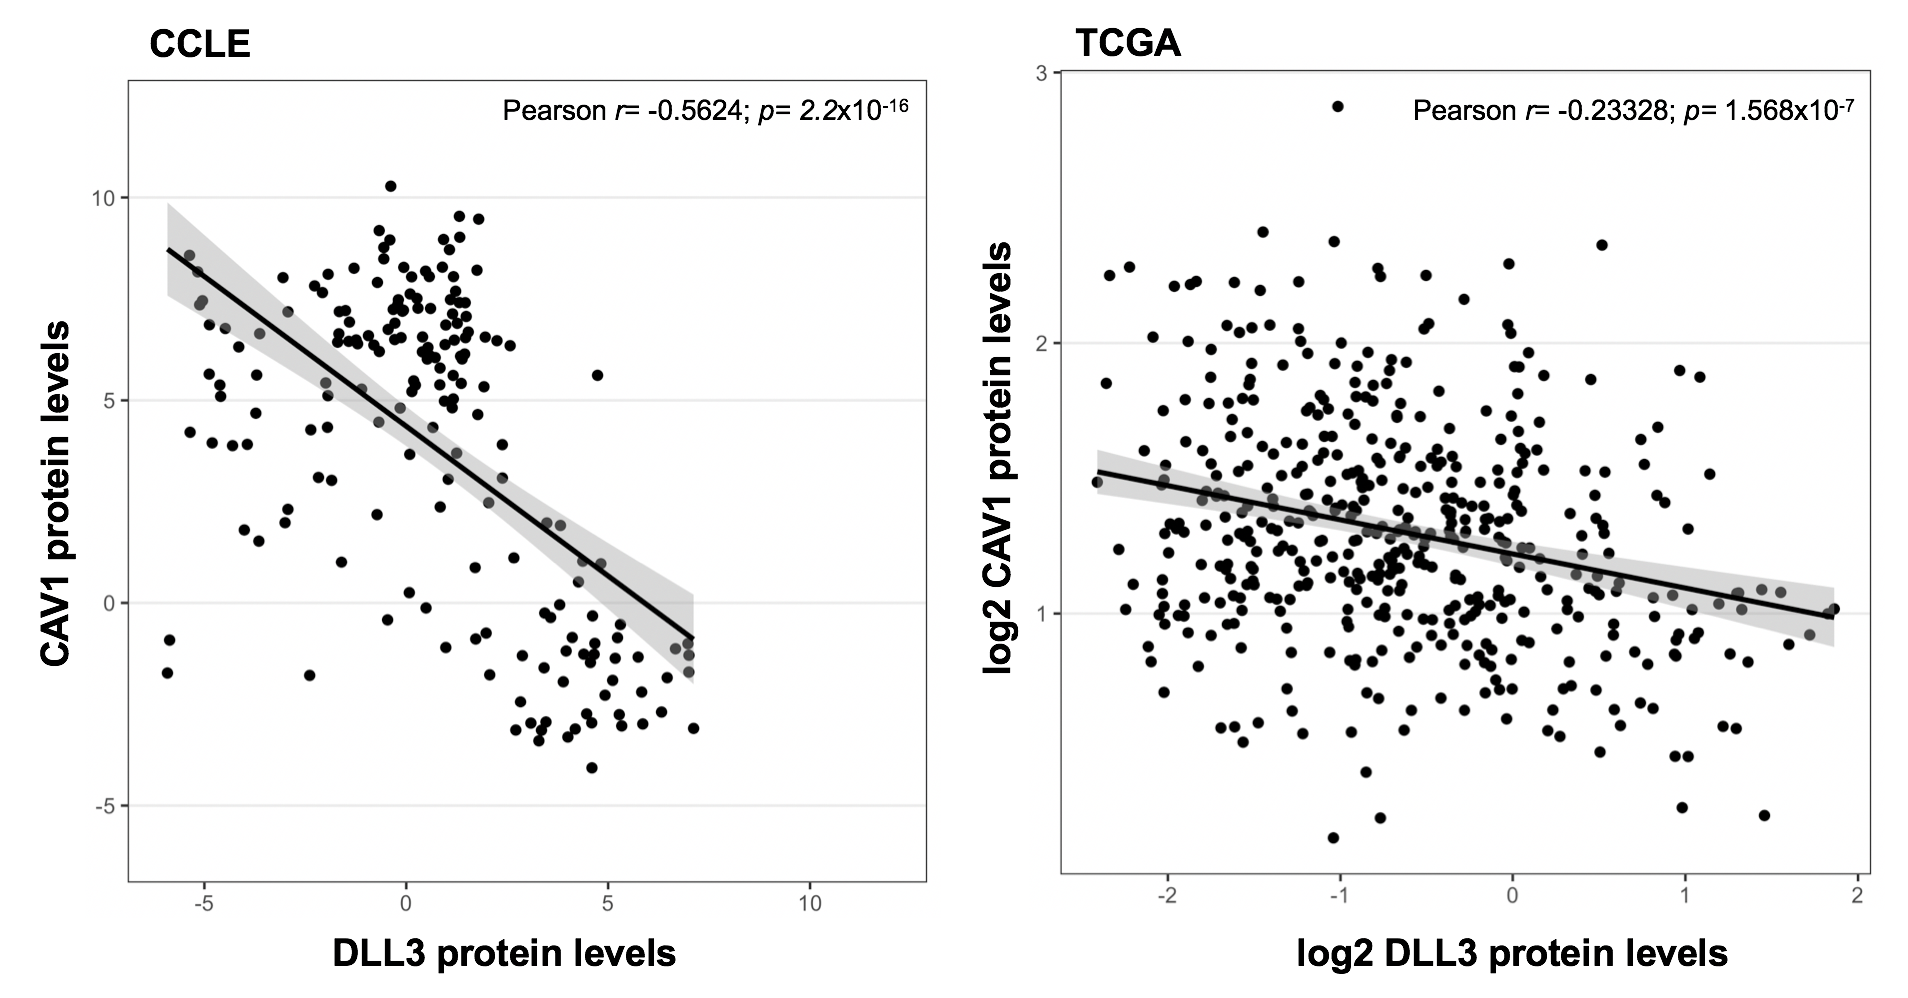
**

**Supplementary Figure 16.** Negative correlation between CAV1 and DLL3 proteins in lung cancer cell lines and lung tumors obtained from data of Cancer Cell Line Encyclopedia (CCLE) and The Cancer Genome Atlas (TCGA <https://www.cancer.gov/tcga>.).

**
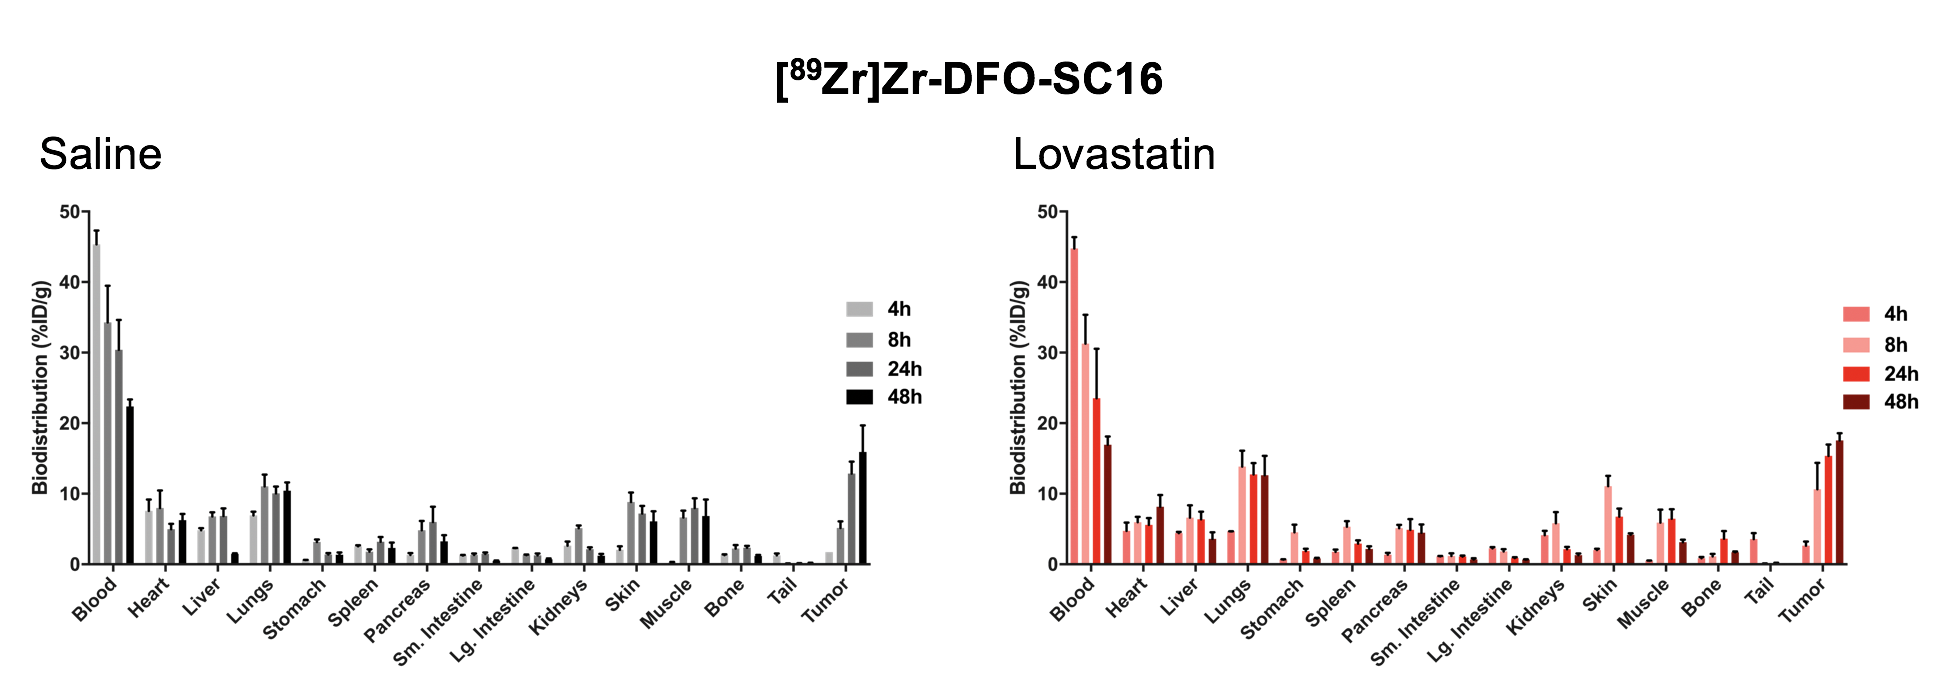
**

**Supplementary Figure 17.** Biodistribution data in saline- and lovastatin-treated mice bearing s.c. H82 (DLL3+) tumors at 4, 8, 24, and 48 h p.i. of [89Zr]Zr-DFO-SC16. Lovastatin (8.3 mg kg−1 of mice) was orally administrated 12 h prior and at the same time as the tail vein injection of [89Zr]Zr-DFO-SC16 (3.70–5.55 Mbq, 25.3–37.9 μg protein). Bars, n = 5 mice per group, mean ± S.E.M. %ID g−1, percentage of injected dose per gram.

**Supplementary Table 1.** Specific binding of [89Zr]Zr-DFO-IgG (100 μM) to A431 and PC3pip cells treated with statins (*n* = 3, mean ± S.E.M).

|  | A431 | PC3Pip |
| --- | --- | --- |
| Control | 0.13 ± 0.02 | 0.22 ± 0.01 |
| Lovastatin | 0.15 ± 0.04 | 0.23 ± 0.02 |
| Simvastatin | 0.09 ± 0.01 | 0.14 ± 0.03 |
| Rosuvastatin | 0.10 ± 0.01 | 0.23 ± 0.02 |
